# Supplementary material for: Tumor-agnostic cancer therapy using antibodies targeting oncofetal chondroitin sulfate
Source: PubMed Central journal article supplement — Nat Commun. 2024 Aug 30;15:7553. doi: 10.1038/s41467-024-51781-0 (PMC11364678; doi:10.1038/s41467-024-51781-0), 2024-08-30
Supplement: 41467_2024_51781_MOESM3_ESM.pdf [file 41467_2024_51781_MOESM3_ESM.pdf]

**Supplementary Data 1:** List of statistically significant proteins obtained by Mass Spectrometry analysis of protein pull-downs from human colon biopsies with C9, F4, and F3 scFv2 and SpyC2 as a control run in triplicates (n=3) with respective  $-\log_{10}$ value and  $\log_2$  fold change values. Two-sided unpaired t-test with Benjamin Hochberg correction for multiple hypothesis testing was applied to determine differentially expressed proteins (significance threshold set to 1% and fold change to 2). Non-significant hits as defined by ( $\log_2FC < 1$  and  $-\log_{10}pvalue < 2$ ) were omitted.

**Supplementary Movie 1:** Inter-fabs conformational flexibility generated by 3D flex

**Supplementary Movie 2:** Molecular Dynamics flexible fitting modeling CS glycan chains onto tetrameric fab complex
